# Supplementary material
Source: ML conference proceedings conference paper supplement (https://proceedings.neurips.cc/paper_files/paper/2022/hash/190dd6a5735822f05646dc27decff19b-Abstract.html)
Supplement: Supplementary file 1 [file 190dd6a5735822f05646dc27decff19b-Supplemental-Datasets_and_Benchmarks.zip]

Archive with 4 entries (4 files):
- Semi-supervised-learning-main.zip
- __MACOSX/._Semi-supervised-learning-main.zip
- USB_appendix.pdf
- __MACOSX/._USB_appendix.pdf
